# Supplementary material for: Operando quantification of diffusion-induced stresses in O3-type NaNi1/3Fe1/3Mn1/3O2 sodium-ion battery electrode during electrochemical cycling
Source: Royal Society of Chemistry journal article supplement (doi:10.1039/d5eb00044k), 2025-01-01
Supplement: d5eb00044k1.pdf [file d5eb00044k1.pdf]

## Supplementary Information

### **Operando quantification of diffusion-induced stresses in O3-type $\text{NaNi}_{1/3}\text{Fe}_{1/3}\text{Mn}_{1/3}\text{O}_2$ sodium-ion battery electrode during electrochemical cycling**

Amit Chanda<sup>1</sup>, Daniel P. Abraham<sup>2</sup>, Stephen E. Trask<sup>2</sup>, Siva P.V. Nadimpalli<sup>1\*</sup>

<sup>1</sup>Department of Mechanical Engineering, Michigan State University, 428 S. Shaw Lane, East Lansing, MI, 48824, USA

<sup>2</sup>Chemical Sciences and Engineering Division, Argonne National Laboratory, Lemont, Illinois, 60439, USA

\*Corresponding author. Email: *sivan@msu.edu*

#### **S1. Electrode porosity calculation**

The electrode porosity is estimated as follows:

$$\text{Electrode Porosity (\%)} = 1 - \left( \frac{\text{Apparent coating density}}{\text{Theoretical compact coating density}} \right)$$

The *theoretical* compact coating density is calculated based on the rule of mixtures, considering the bulk density ( $\rho$ ) and weight fraction of each composite component, as follows:

$$\text{Theoretical compact coating density} = \frac{1}{\frac{W_{NFM}}{\rho_{NFM}} + \frac{W_c}{\rho_c} + \frac{W_{binder}}{\rho_{binder}}}$$

where  $W_i$  is the weight fraction of the  $i^{\text{th}}$  component; NFM is  $\text{NaNi}_{1/3}\text{Fe}_{1/3}\text{Mn}_{1/3}\text{O}_2$  and  $c$  stands for carbons (Timcal C-45, Tuball SWCNT). The densities of the materials are as reported by the manufacturer and assume no porosity within the particles.

The *apparent* coating density is calculated by the ratio *weight/geometric volume* using several electrode samples from which the average weight and thickness are determined. Naturally, the current collector properties are subtracted in the calculation. The electrode thickness is measured using a digital micrometer.

**Table S1.** NFM111 electrode composition and cell chemistry.

### NFM111 electrode (single-sided; calendered)

95 wt%  $\text{NaNi}_{1/3}\text{Fe}_{1/3}\text{Mn}_{1/3}\text{O}_2$  (Gelon)

2.95 wt% Timcal C-45 + 0.05 wt.% Tuball SWCNT

2 wt% Solvay 5130 PVDF Binder

|                                  |                       |
|----------------------------------|-----------------------|
| <b>Al Foil Thickness</b>         | 20 $\mu\text{m}$      |
| <b>Total Electrode Thickness</b> | 156 $\mu\text{m}$     |
| <b>Coating Thickness</b>         | 136 $\mu\text{m}$     |
| <b>Porosity</b>                  | 34.4 %                |
| <b>Total Coating Density</b>     | 2.75 $\text{g/cm}^3$  |
| <b>Total Coating Loading</b>     | 37.4 $\text{mg/cm}^2$ |
| <b>NFM111 Loading</b>            | 35.5 $\text{mg/cm}^2$ |

**Separator:** Glass Fiber (Whatman, Grade GF/F)

**Electrolyte:** 1M  $\text{NaClO}_4$  in PC + 5 wt% FEC

**Na-metal:** Purchased as cubes (Sigma-Aldrich)

### Figures

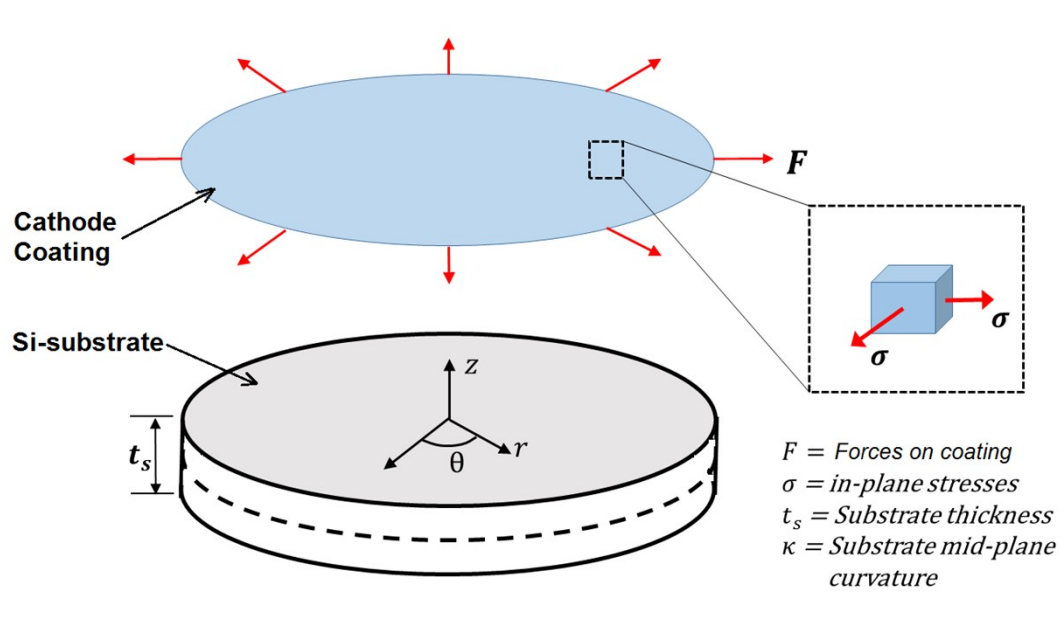

**Fig. S1.** Schematic shows that the typical stress state in a thin film coating on a substrate is in-plane equibiaxial stress ( $\sigma$ ), because the expansion/contraction of the film is constrained by the substrate. The out of plane stress, i.e., stress in z direction is zero as the film is free to expand/contract in that direction.<sup>1</sup>

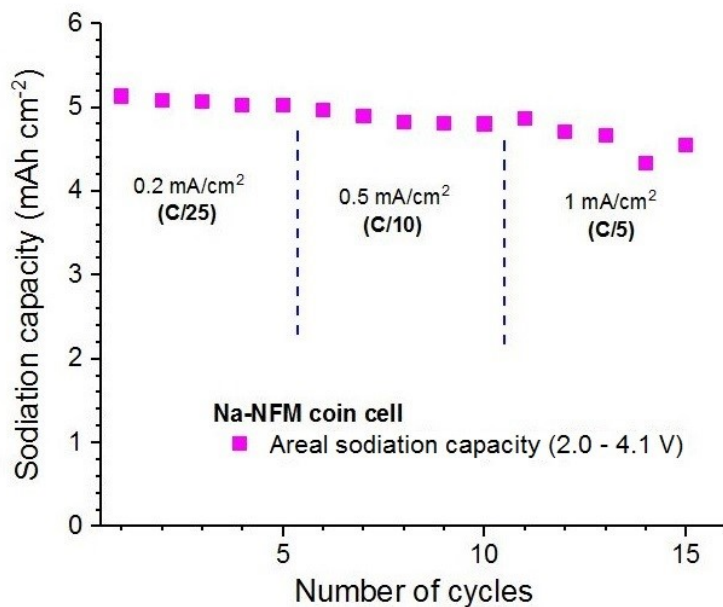

**Figure S2.** Discharge (sodiation) capacity of NFM111 electrode vs. cycle number at the indicated currents. In addition to the NFM111, the coin cell contained a Na-metal counter electrode, glass fiber separator and an electrolyte with 1M NaClO<sub>4</sub> salt in PC+ 5 wt% FEC solvent.

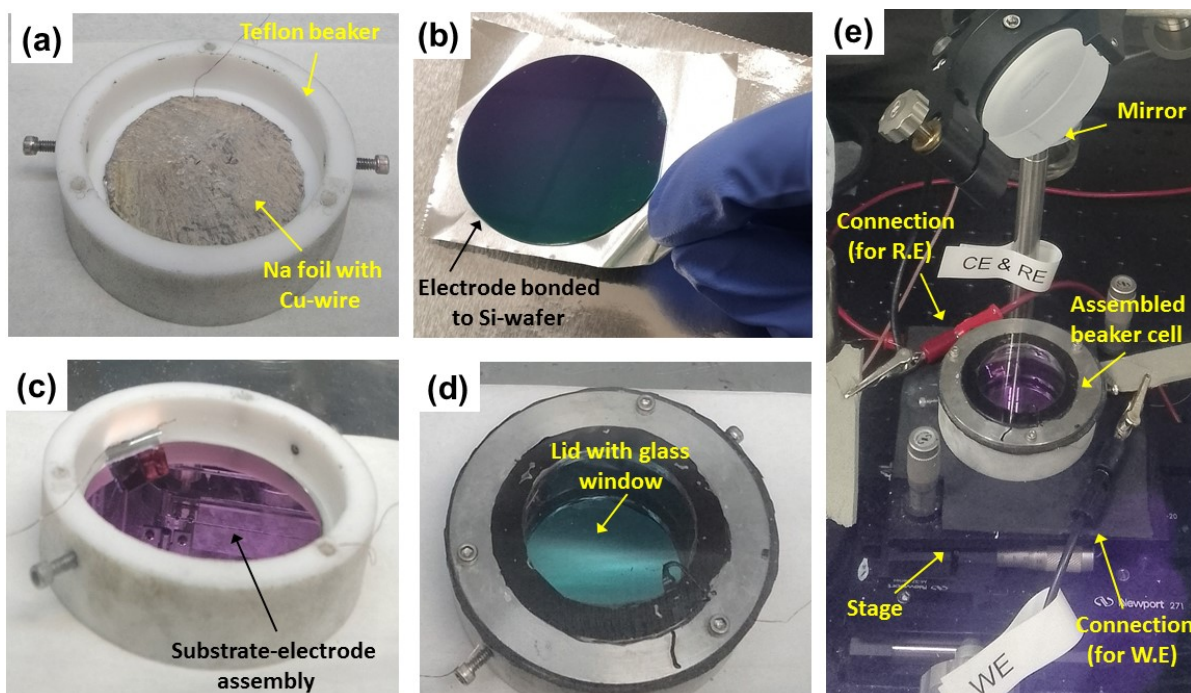

**Figure S3.** Steps of the beaker cell assembly: (a) Na foil with embedded Cu-wire placed in a Teflon beaker, (b) Aluminum current collector of the NFM111 electrode bonded to Si-wafer, (c) NFM111 electrode stacked on top of Na foil with a separator in between to prevent physical contact, (d) covering the beaker with a stainless-steel lid comprising a glass window. (e) shows an assembled beaker cell, placed inside a glovebox, with electrical connections for the electrochemical cycling and optical arrangements for the substrate-curvature measurement.

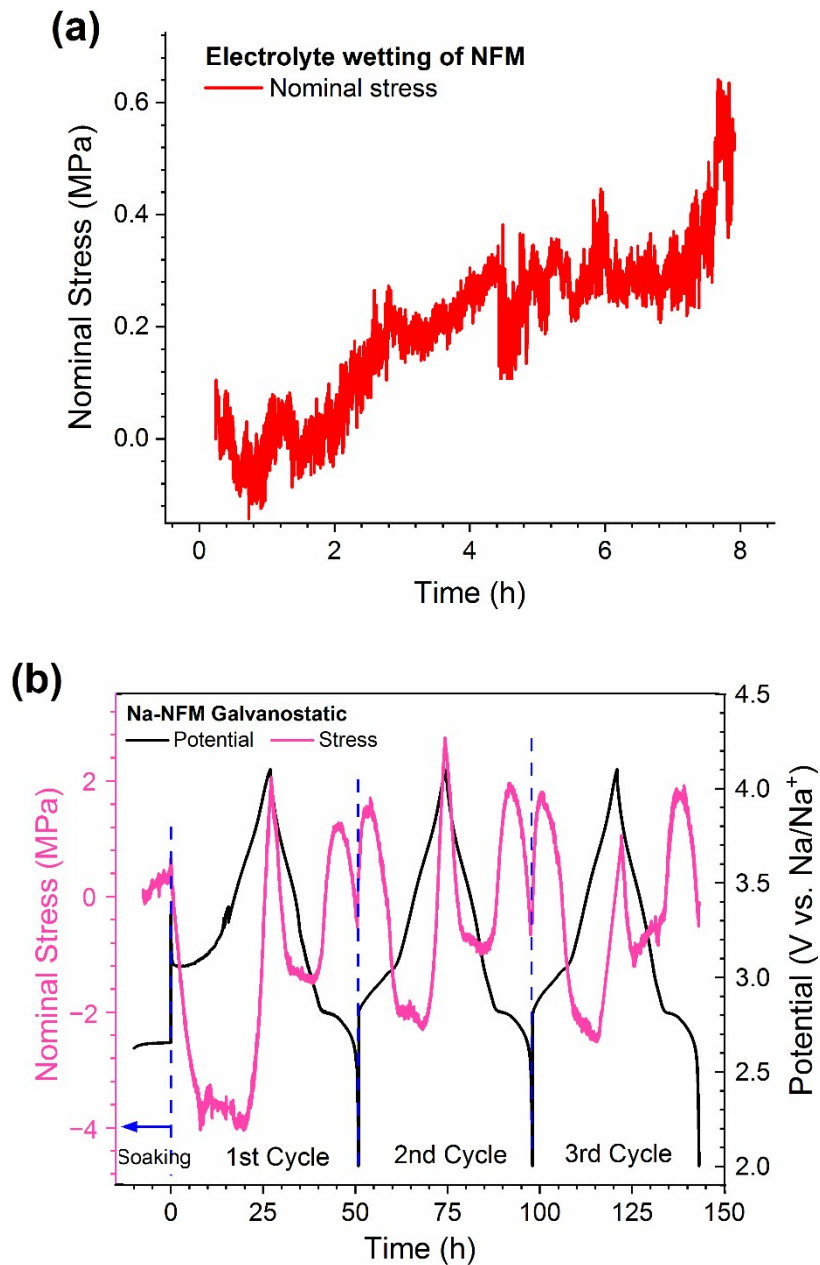

**Figure S4.** (a) Stress evolution in the NFM111 electrode due to wetting by the electrolyte, prior to any electrochemical cycling, (b) Potential and stress evolution in the NFM111 electrode during 3 galvanostatic cycles conducted in a beaker cell, with a current of 0.2 mA/cm<sup>2</sup>.

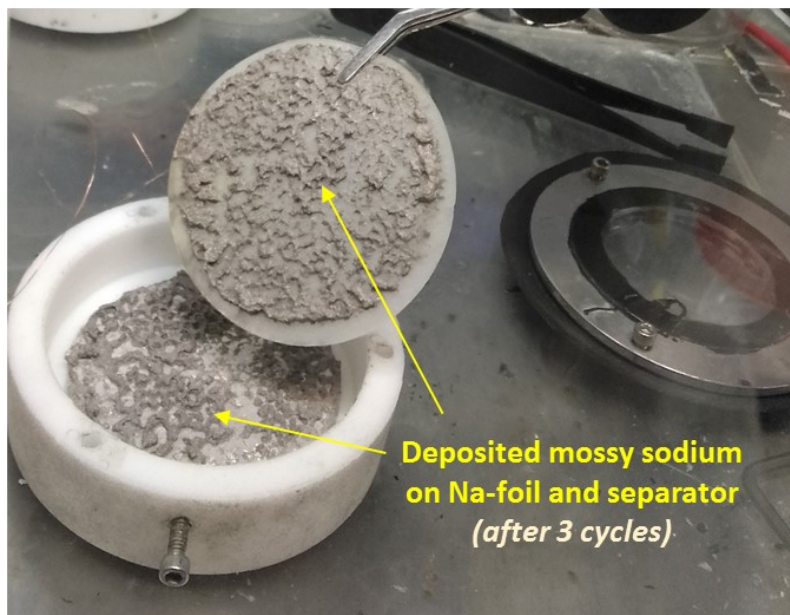

**Figure S5.** Changes to the Na-foil counter electrode after 3 cycles between 2.0 – 4.1 V vs. Na. Note that the high capacity high ( $\sim 5 \text{ mAh cm}^{-2}$ ) transferred during these cycles aggravates degradation of the Na-metal.

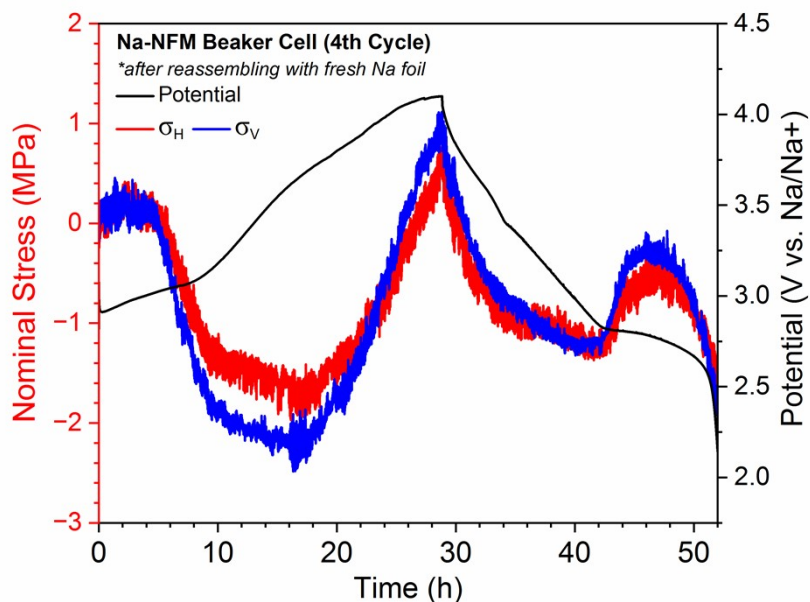

**Figure S6.** Potential and stress evolution in the NFM111 electrode during 4th galvanostatic cycle (after reassembling the cell with fresh Na foil), with a current of  $0.2 \text{ mA/cm}^2$ .

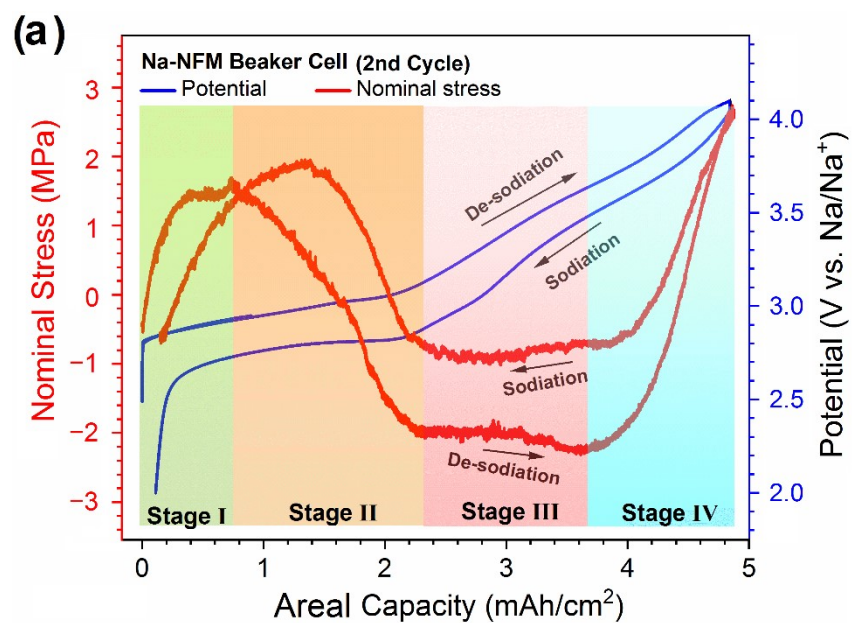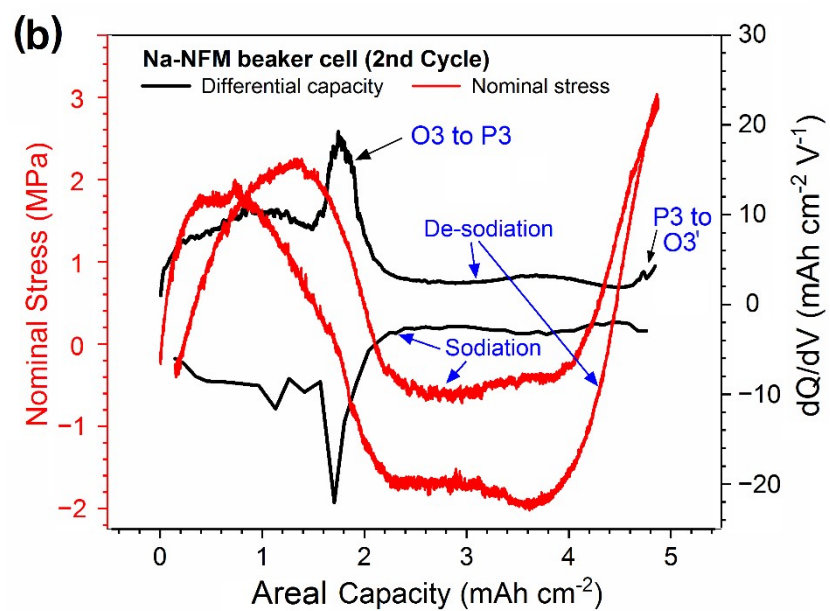

**Figure S7.** (a) Potential and stress of NFM111 electrode as a function of areal capacity showing different stages of stress during the 2<sup>nd</sup> cycle between 2- 4.1 V. (b) has the corresponding differential capacity (dQ/dV) plot.

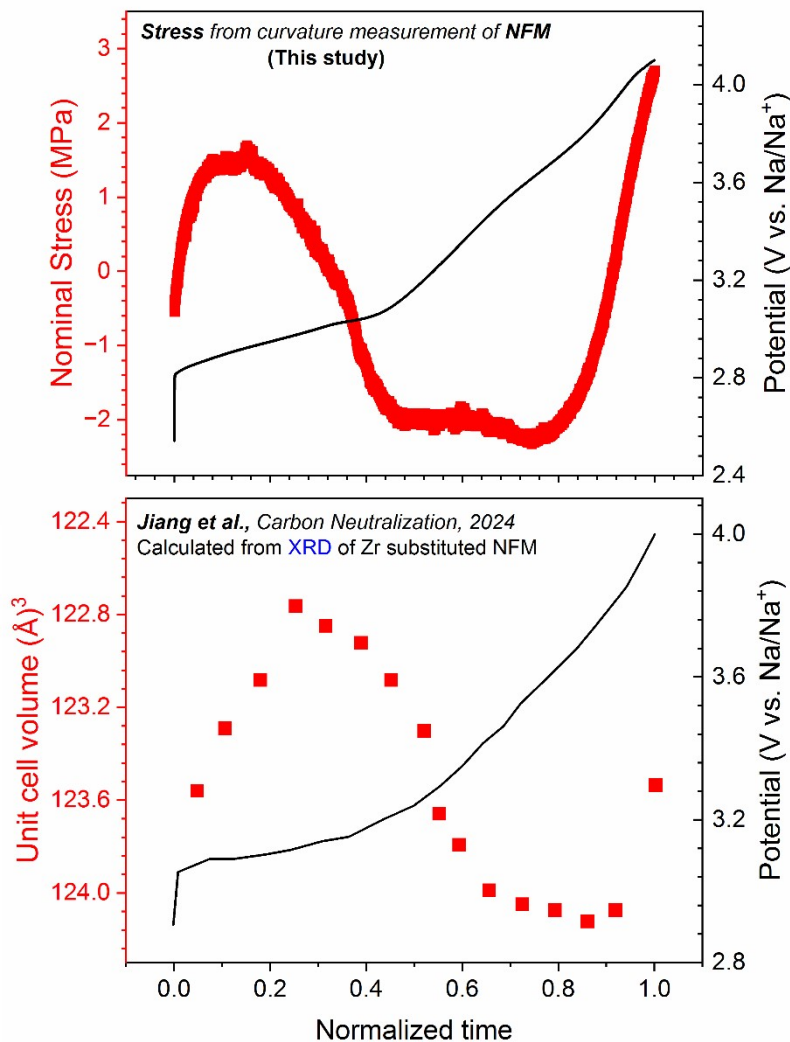

**Figure S8.** Comparison of stress data (from this study) with unit cell volume change from the research literature (Jiang et al., *Carbon Neutralization*, 2024 <sup>2</sup>) observed during Na<sup>+</sup> extraction from NFM electrode.

## References

- (1) Freund, L. B.; Suresh, S. Thin Film Materials: Stress, Defect Formation and Surface

Evolution. *Cambridge Univ. Press* **2003**.

- (2) Jiang, C.; Wang, Y.; Xin, Y.; Ding, X.; Liu, S.; Pang, Y.; Chen, B.; Wang, Y.; Gao, L. L.; Wu, F.; Gao, H. Toward High Stability of O3-type  $\text{NaNi}_{1/3}\text{Fe}_{1/3}\text{Mn}_{1/3}\text{O}_2$  Cathode Material with Zirconium Substitution for Advanced Sodium-Ion Batteries. *Carbon Neutralization* **2024**, 3, 233–244. <https://doi.org/10.1002/cnl2.115>.
